# Supplementary material
Source: PubMed Central journal article supplement (PMC4442570)
Supplement: Supp_Data.pdf [file Supp_Data.pdf]

## Supplementary Data

### Supplementary Methods

We carried out Young's modulus measurements of synthesized gel by following the Japan Industrial Standard, JIS K6503-1996. Briefly, the prepared hydrogel was compressed by using a mechanical tester (EZ test, Cross-

head speed: 1 mm/min). The force value obtained at 2 mm from the gel top after compression was applied to the following equation.

$$\text{Young's modulus (Pa)} = \text{force (N)} / \text{surface area (mm}^2\text{)}$$

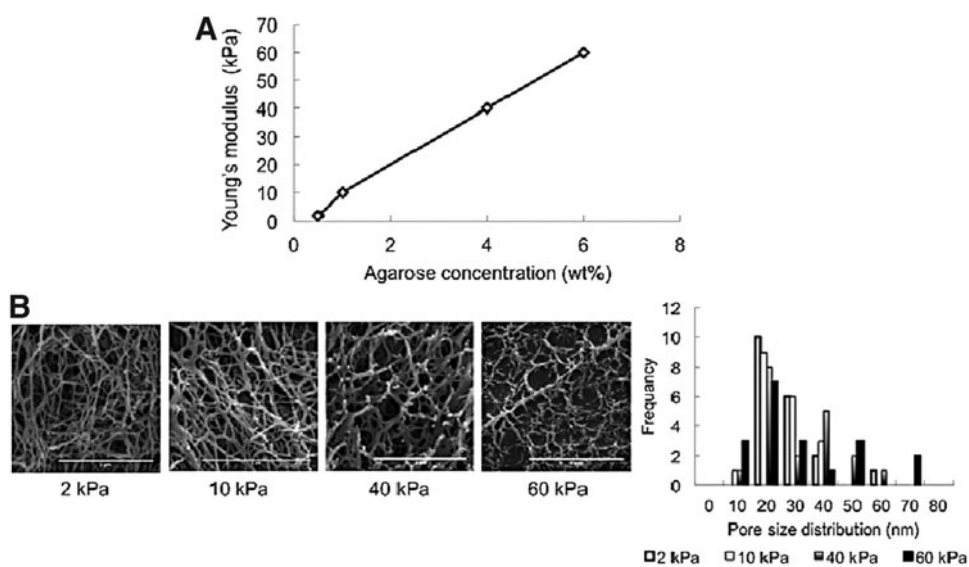

**SUPPLEMENTARY FIG. S1.** (A) Graph showing the effect of agarose concentration on the Young's modulus of agarose hydrogel. (B) Scanning electron microscopy showed nanoporous structure of the agarose hydrogel (scale bar = 1  $\mu\text{m}$ ). Graph depicting the frequency of the pore sizes distribution inside the hydrogel ( $n=3$ ).

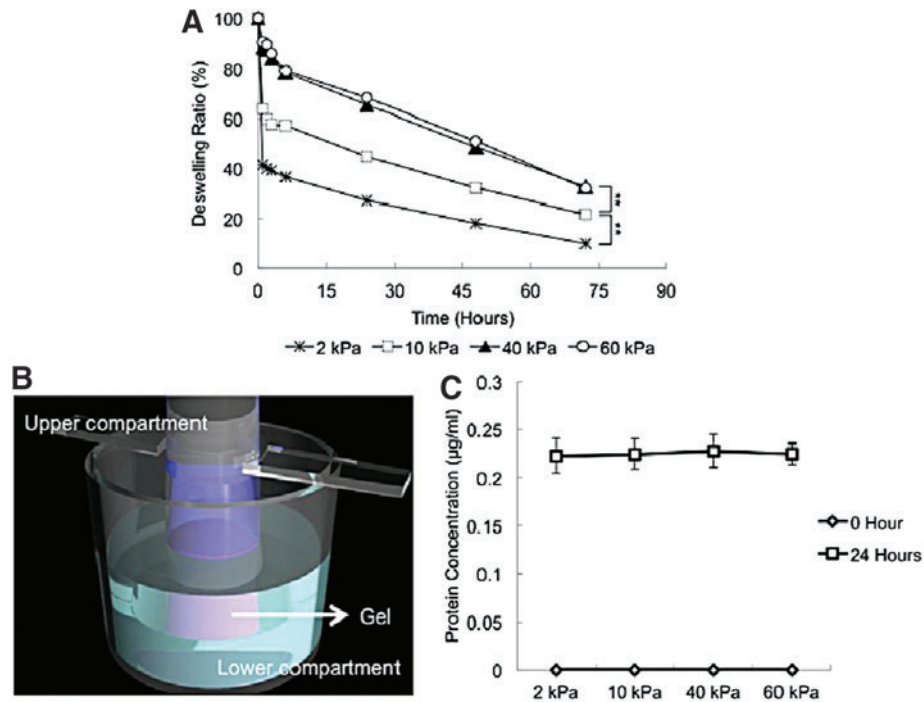

**SUPPLEMENTARY FIG. S2.** (A) Graph depicting the deswelling ratio of the agarose hydrogel (\*\* $p < 0.001$ ) ( $n = 5$ ). (B) Schematic diagram of the modified two-compartment system for gel permeability. Upper compartment filled with gel and protein substrate. Pink color represents gel, blue color represents protein. Lower part filled with distilled water. (C) Permeability of the different concentrated hydrogel ( $n = 4$ ).

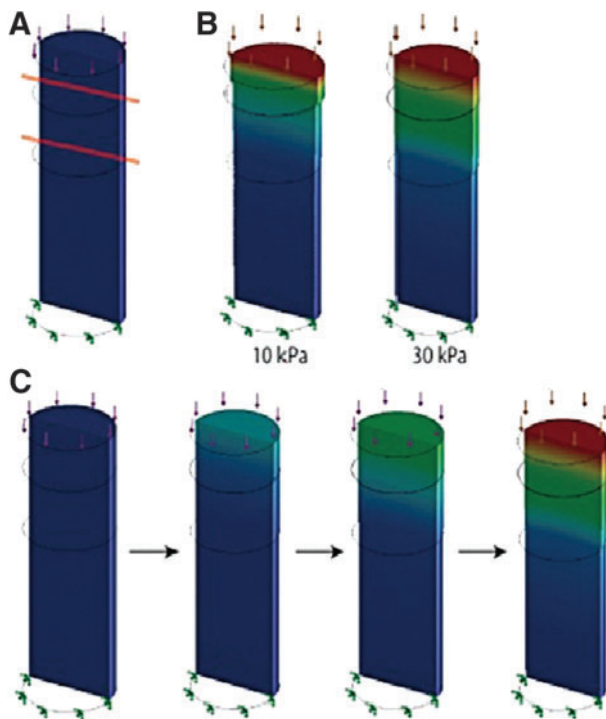

**SUPPLEMENTARY FIG. S3.** (A) Finite element analysis of the bone tissue consisting of bone stem, cartilaginous bone head, and the attached hydrogel. (B) The displacement of tissue was especially observable in the cartilaginous bonehead region, but not the bone stem region. (C) The displacement of cartilage tissue attaching to the gel with different Young's modulus (left; 10 kPa, right; 30 kPa).
